# Supplementary material for: Risk factors associated with higher pain levels among pediatric burn patients: a retrospective cohort study
Source: PubMed Central journal article supplement — Reg Anesth Pain Med. 2020 Nov 9;46(3):222–7. doi: 10.1136/rapm-2020-101691 (PMC7907549; doi:10.1136/rapm-2020-101691), 2020-11-09
Supplement: rapm-2020-101691supp001.pdf [file rapm-2020-101691supp001.pdf]

**Appendix 1. Participant Burn TBSA**

| TBSA % | N (%)<br>N = 2013 | Cumulative % |
|--------|-------------------|--------------|
| 0.5    | 62 (3.1)          | 3.1          |
| 1.0    | 1466 (72.8)       | 75.9         |
| 1.5    | 118 (5.9)         | 81.8         |
| 2.0    | 171 (8.5)         | 90.3         |
| 2.5    | 23 (1.1)          | 91.4         |
| 3.0    | 75 (3.7)          | 95.1         |
| 3.5    | 6 (0.3)           | 95.4         |
| 4.0    | 34 (1.7)          | 97.1         |
| 4.5    | 3 (0.1)           | 97.3         |
| 5.0    | 18 (0.9)          | 98.2         |
| 6.0    | 11 (0.5)          | 98.7         |
| 7.0    | 3 (0.1)           | 98.9         |
| 7.5    | 1 (0.0)           | 98.9         |
| 8.0    | 6 (0.3)           | 99.2         |
| 10.0   | 5 (0.2)           | 99.5         |
| 11.0   | 1 (0.0)           | 99.7         |
| 12.0   | 3 (0.1)           | 99.7         |
| 14.0   | 1 (0.0)           | 99.8         |
| 16.0   | 2 (0.1)           | 99.9         |
| 18.0   | 1 (0.0)           | 99.9         |
| 20.0   | 1 (0.0)           | 99.9         |
| 21.0   | 1 (0.0)           | 100          |
| 23.0   | 1 (0.0)           | 100          |

Abbreviation: TBSA, Total body surface area; N, number of participants
